# Supplementary material for: The Unified Protocol for Transdiagnostic Treatment of Emotional Disorders Among Japanese Children: A Pilot Study
Source: Frontiers journal article supplement (doi:10.3389/fpsyg.2021.731819), 2021-11-25
Supplement: Table_1.pdf [file Table_1.pdf]

**Supplementary Table 1.** Descriptive Statistics for Satisfaction with the Program

| Items (response alternatives)                                                                                                                                                                                                | <i>Mean (SD)</i> |               |
|------------------------------------------------------------------------------------------------------------------------------------------------------------------------------------------------------------------------------|------------------|---------------|
|                                                                                                                                                                                                                              | Child-report     | Parent-report |
| 1 How would you rate the quality of service you have received?<br>(1: Poor, 2: Fair, 3: Good, 4: Excellent)                                                                                                                  | 3.13 (1.25)      | 3.67 (0.49)   |
| 2 Did you get the kind of service you wanted?<br>(1: No, definitely not, 2: No, not really, 3: Yes, generally, 4: Yes, definitely)                                                                                           | 2.87 (1.13)      | 3.13 (0.64)   |
| 3 To what extent has our program met your needs?<br>(1: None of my needs have been met, 2: Only a few of my needs have been met, 3: Most of my needs have been met, 4: Almost all of my needs have been met)                 | 3.27 (1.10)      | 2.80 (0.86)   |
| 4 If a friend were in need of similar help, would you recommend our program to him or her?<br>(1: No, definitely not, 2: No, I don't think so, 3: Yes, I think so, 4: Yes, definitely)                                       | 3.13 (1.06)      | 3.60 (0.51)   |
| 5 How satisfied are you with the amount of help you received?<br>(1: Quite dissatisfied, 2: Indifferent or mildly dissatisfied, 3: Mostly satisfied, 4: Very satisfied)                                                      | 3.40 (0.91)      | 3.20 (0.56)   |
| 6 Have the services you received helped you to deal more effectively with your problems?<br>(1: No, they seemed to make things worse, 2: No, they really didn't help, 3: Yes, they helped, 4: Yes, they helped a great deal) | 3.07 (0.80)      | 3.40 (0.63)   |
| 7 In an overall, general sense, how satisfied are you with the service you have received?<br>(1: Quite dissatisfied, 2: Indifferent or mildly dissatisfied, 3: Mostly satisfied, 4: Very satisfied)                          | 3.20 (1.08)      | 3.60 (0.63)   |
| 8 If you were to seek help again, would you come back to our program?<br>(1: No, definitely not, 2: No, I don't think so, 3: Yes, I think so, 4: Yes, definitely)                                                            | 2.87 (1.25)      | 3.60 (0.51)   |
